# Supplementary material
Source: PubMed Central journal article supplement (PMC5395123)
Supplement: 2016_157180-Disclosures_and_Contributions.pdf [file 2016_157180-Disclosures_and_Contributions.pdf]

Haematologica  
HAEMATOL/2016/157180  
Version 2

Impact of FLT3-ITD diversity on response to induction chemotherapy in  
patients with acute myeloid leukemia

Mike Fischer, Ulf Schnetzke, Bärbel Spies-Weisshart, Mario Walther,  
Maximilian Fleischmann, Inken Hilgendorf, Andreas Hochhaus, and  
Sebastian Scholl

Disclosures: This work was in part supported by a grant from Gilead (Munich, Germany)  
(Sebastian Scholl, Ulf Schnetzke)

Contributions: MiF, BSW, US and SS collected AML samples, performed experimental  
work and sequence analyses. MaF, IH and SS collected clinical data. US and MW  
performed statistical analyses. SS, AH and US designed research and wrote the  
manuscript.
